# Supplementary material for: METTL14 modulates glycolysis to inhibit colorectal tumorigenesis in p53‐wild‐type cells
Source: PubMed Central journal article supplement (PMC10074077; doi:10.15252/embr.202256325), 2023-02-16

Source data for Fig 4

Fig 4A

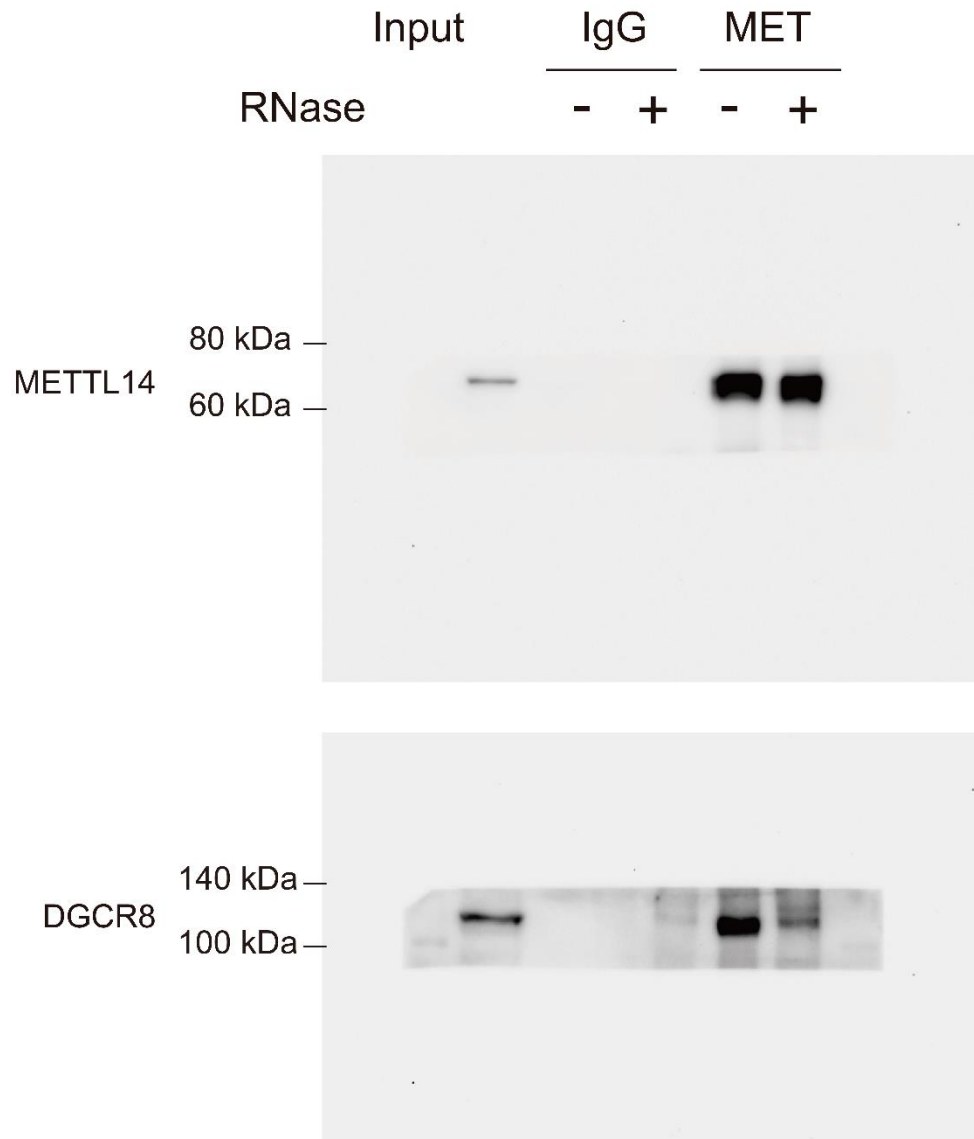

Fig 4E

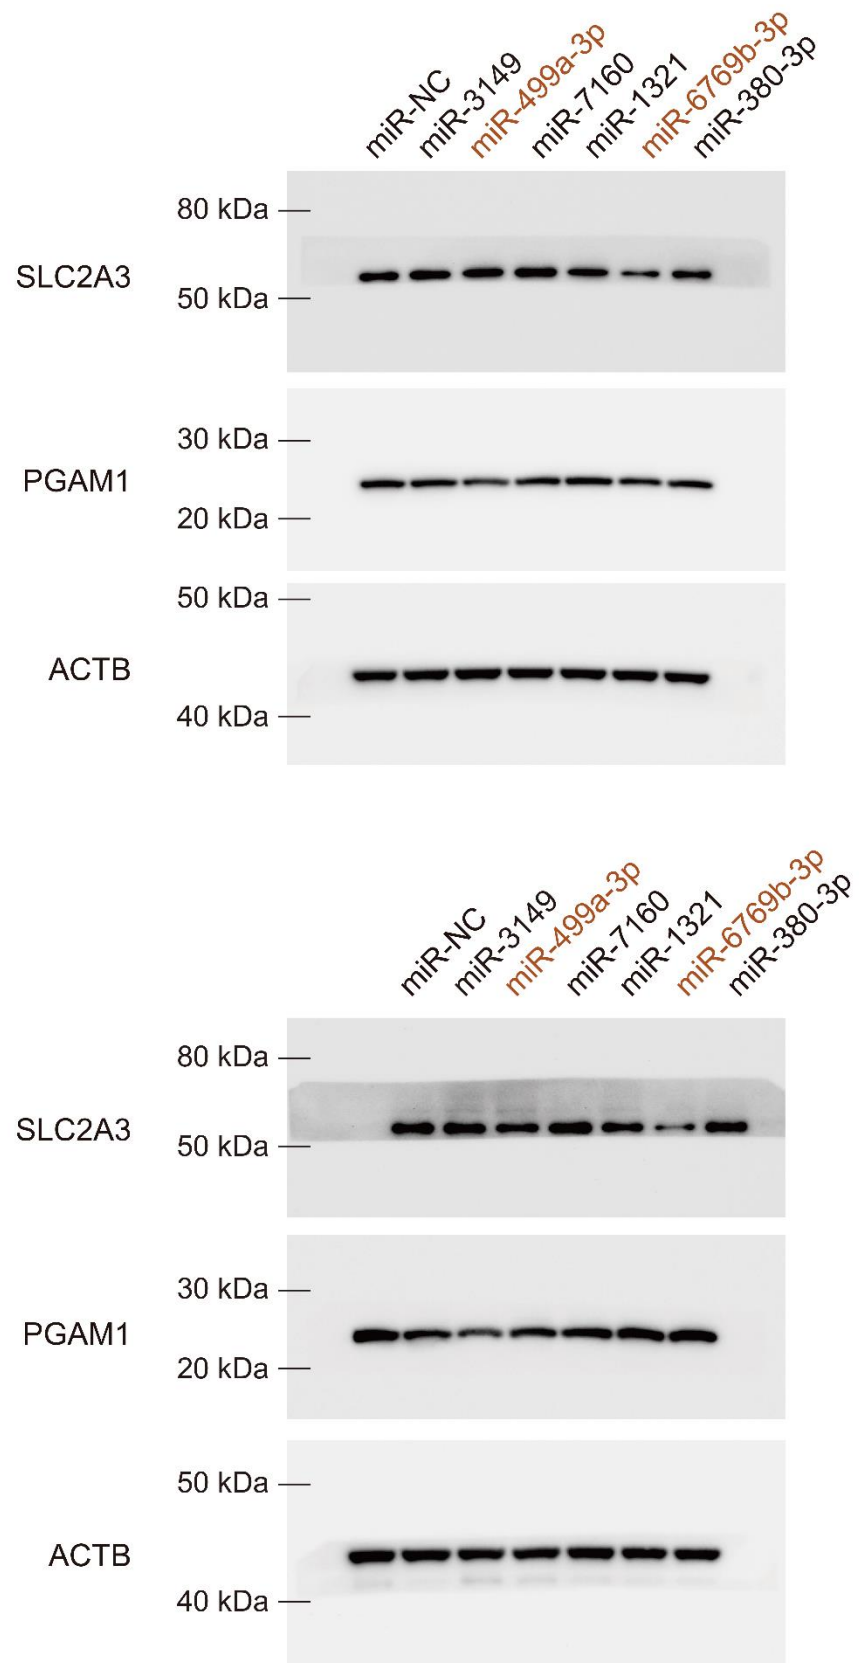

Supplement: EMBR-24-e56325-s002.pdf [file EMBR-24-e56325-s002.pdf]
