# Supplementary material for: METTL14 modulates glycolysis to inhibit colorectal tumorigenesis in p53‐wild‐type cells
Source: PubMed Central journal article supplement (PMC10074077; doi:10.15252/embr.202256325), 2023-02-16
Supplement: EMBR-24-e56325-s005.pdf [file EMBR-24-e56325-s005.pdf]

**Appendix for METTL14 loss modulates glycolysis reprogramming to drive p53-wild type colorectal tumorigenesis**

Yichao Hou<sup>1,†</sup>, Xintian Zhang<sup>1,†</sup>, Han Yao<sup>1,†</sup>, Lidan Hou<sup>1</sup>, Qingwei Zhang<sup>2</sup>, Enwei Tao<sup>2</sup>, Shanshan Jiang<sup>2</sup>, Yimeng Ren<sup>2</sup>, Xialu Hong<sup>2</sup>, Shiyuan Lu<sup>2</sup>, Xiaoxu Leng<sup>2</sup>, Xiaoqiang Zhu<sup>3</sup>, Yile Xie<sup>2</sup>, Yaqi Gao<sup>2</sup>, Yu Liang<sup>1</sup>, Ting Zhong<sup>1</sup>, Bohan Long<sup>1</sup>, Jing-Yuan Fang<sup>2,\*</sup>, Xiangjun Meng<sup>1,\*\*</sup>

| Table of content        | Page   |
|-------------------------|--------|
| Appendix Figure S1..... | 2      |
| Appendix Figure S2..... | 3      |
| Appendix Figure S3..... | 4      |
| Appendix Figure S4..... | 5      |
| Appendix Figure S5..... | 6      |
| Appendix Figure S6..... | 7      |
| Appendix Figure S7..... | 8      |
| Appendix Figure S8..... | 9      |
| Appendix Figure S9..... | 10     |
| Appendix Table S1.....  | 11     |
| Appendix Table S2.....  | 12, 13 |
| Appendix Table S3.....  | 14     |

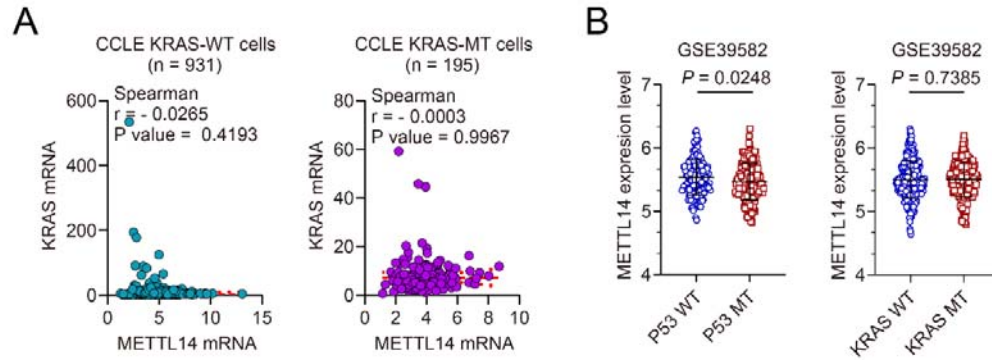

**Appendix Figure S1.** Correlations of METTL14 and p53 or KRAS in CRC cells or CRC tissues.

A Correlation of METTL14 and p53 mRNA levels in KRAS-wild type (KRAS-WT) and KRAS-mutant (KRAS-MT) CRC cell lines from CCLE database. Statistical significance was determined by analysis of the Pearson's correlation coefficient.

B. Expression analysis of METTL14 in p53-WT (Biological replicates n = 161) and p53-MT (Biological replicates n = 190) or KRAS-WT (Biological replicates n = 328) and KRAS-MT (Biological replicates n = 217) CRC tissues from GSE39582. Data are presented as mean  $\pm$  SD. Statistical significance was determined by two-tailed Student's t test.

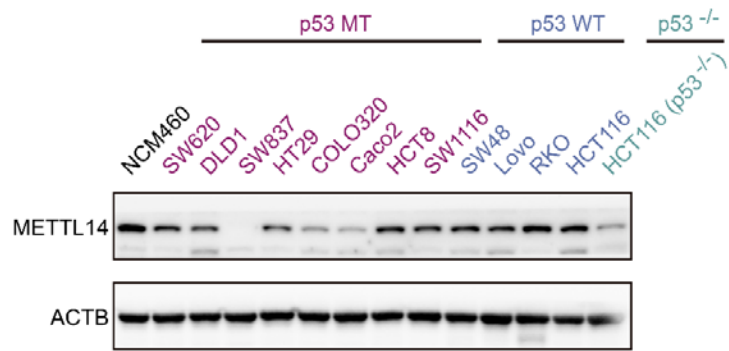

**Appendix Figure S2. Western blot analysis of METTL14 protein level in normal (NCM460) and various CRC cell lines.**

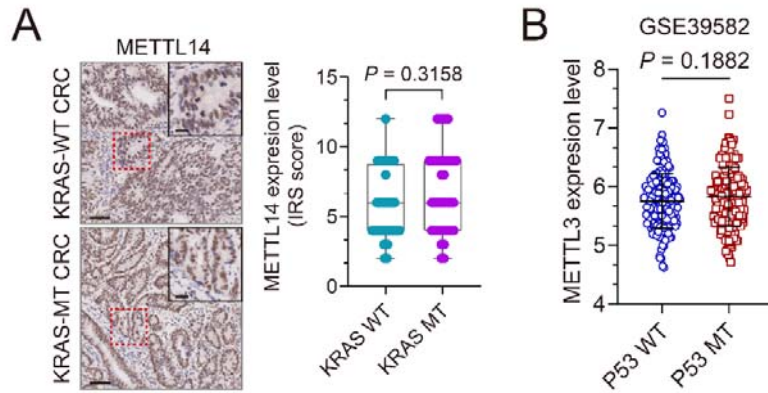

**Appendix Figure S3. Expression of METTL3 in p53-WT and p53-MT CRC tissues.**

A Representative IHC images, and statistical analysis of immunoreactive score (IRS) of METTL3 expression in p53-WT (Biological replicates  $n = 63$ ) and p53-MT (Biological replicates  $n = 41$ ) CRC samples. The insets show enlarged images of indicated p53-WT and p53-MT CRC tissues, respectively. Scale bars =  $20 \mu\text{m}$  and  $2 \mu\text{m}$  (inset). Statistical significance was determined by nonparametric Mann-Whitney test. The horizontal lines represent the median; the bottom and top of the boxes represent the 25% and 75% percentiles, respectively, and the vertical bars represent the range of the data.

B Expression of METTL3 in p53-WT (Biological replicates  $n = 161$ ) and p53-MT (Biological replicates  $n = 190$ ) CRC tissues from GSE39582. Data are presented as mean  $\pm$  SD. Statistical significance was determined by two-tailed Student's t test.

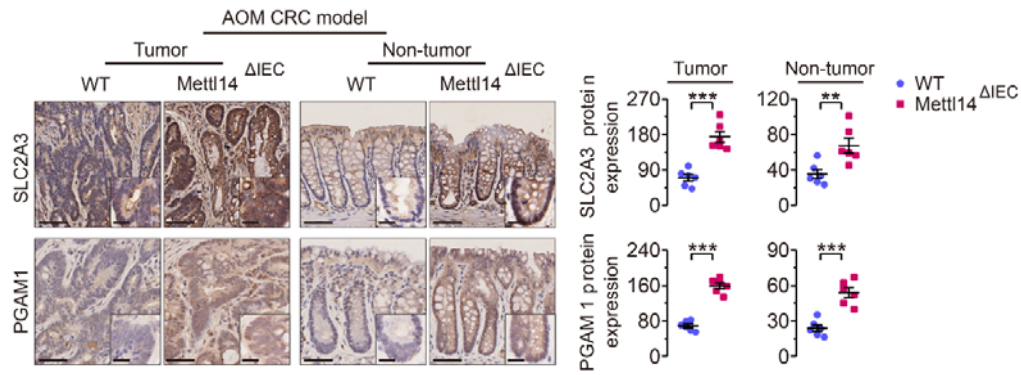

**Appendix Figure S4. Representative IHC staining images and quantitative analysis of SLC2A3 and PGAM1 in tumor and non-tumor tissues from AOM-induced Mettl14<sup>ΔIEC</sup> and Mettl14<sup>WT</sup> mice CRC models.**

The insets show enlarged images of tumor tissues and non-tumor tissues, respectively. Scale bars = 20 μm and 2 μm (inset). Data are presented as mean ± SD (Biological replicates n = 6; \*\*\**P* < 0.001). Statistical significance was determined by two-tailed Student's t test.

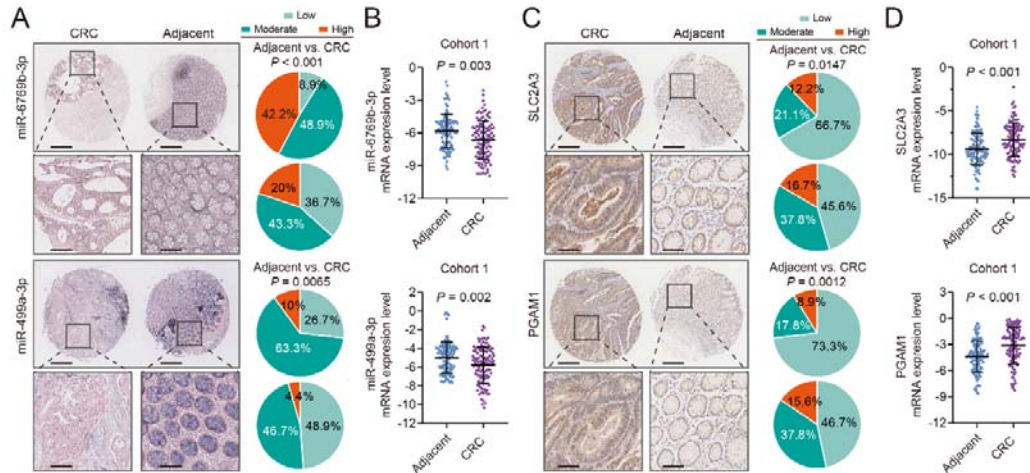

**Appendix Figure S5. Expression levels of miR-6769b-3p/miR-499a-3p and SLC2A3/PGAM1 in CRC and adjacent tissues of patients.**

A Representative IHC staining images and corresponding quantitative analysis of SLC2A3 and PGAM1 in CRC and adjacent tissues of patients from Cohort 2 (n = 90). Lower panels show enlarged images of indicated normal or CRC tissues. Scale bars = 200 μm (upper) and 40 μm (lower). Data are presented as mean ± SD. Percentages of low, moderate and high expression of SLC2A3 (upper) and PGAM1 (bottom) in CRC and adjacent tissues are shown as pie charts.

B qRT-PCR analysis of SLC2A3 (upper) and PGAM1 (bottom) in CRC and adjacent tissues of patients from Jiuyuan Cohort 2 (n = 118). Data are presented as mean ± SD. Statistical significance was determined by two-tailed Student's t test.

C Representative ISH staining images and corresponding quantitative analysis of miR-6769b-3p and miR-499a-3p in CRC and adjacent tissues of patients from Cohort 2 (n = 90). Lower panels show enlarged images of indicated normal or CRC tissues. Scale bars = 200 μm (upper) and 40 μm (lower). Data are presented as mean ± SD. Percentages of low, moderate and high expression of miR-6769b-3p (upper) and miR-499a-3p (bottom) in CRC and adjacent tissues are shown as pie charts.

D qRT-PCR analysis of miR-6769b-3p (upper) and miR-499a-3p (bottom) in CRC and adjacent tissues of patients from Jiuyuan Cohort 2 (n = 118). Data are presented as mean ± SD. Statistical significance was determined by two-tailed Student's t test.

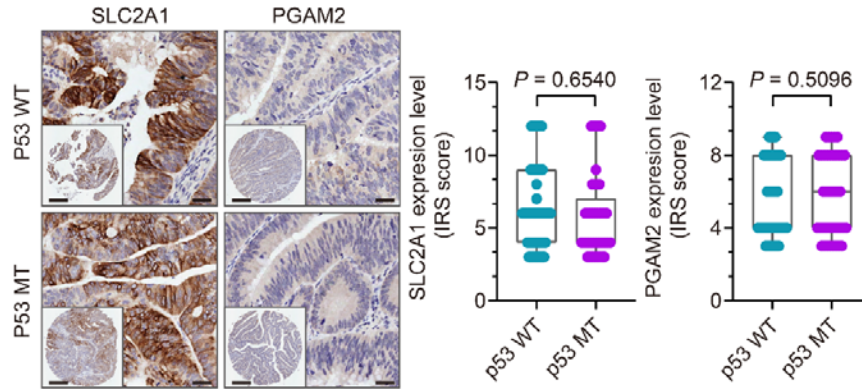

**Appendix Figure S6. Expression levels of SLC2A1 and PGAM2 in p53-WT and p53-MT samples.**

Representative IHC staining images and corresponding quantitative analysis of SLC2A3 and PGAM2 IRS in p53-WT (n = 63) and p53-MT (n = 41) samples from Cohort 3. The insets show enlarged images of indicated p53-WT and p53-MT CRC tissues, respectively. Scale bars = 200  $\mu\text{m}$  and 20  $\mu\text{m}$  (inset). Statistical significance was determined by nonparametric Mann-Whitney test. The horizontal lines represent the median; the bottom and top of the boxes represent the 25% and 75% percentiles, respectively, and the vertical bars represent the range of the data.

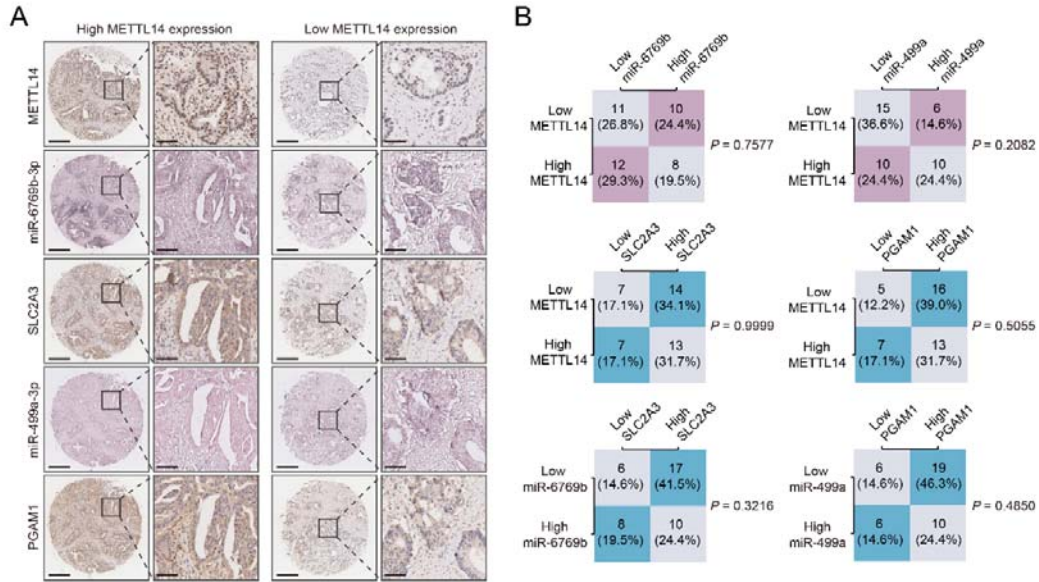

**Appendix Figure S7. Correlation analysis of METTL14, SLC2A3, PGAM1, miR-6769b-3p and miR-499a-3p in p53-MT CRC tissues.**

A Representative IHC and ISH images of METTL14, SLC2A3, PGAM1, miR-6769b-3p and miR-499a-3p in CRC tissues with higher or lower METTL14 expression in p53-MT (n = 41) samples from Cohort 3. The right panel show enlarged images of indicated p53-MT CRC tissues. Scale bars = 200  $\mu$ m (left) and 20  $\mu$ m (right).

B Statistical analysis of METTL14, SLC2A3, PGAM1, miR-6769b-3p and miR-499a-3p in CRC tissues with higher or lower METTL14 expression in p53-MT (n = 41) samples from Cohort 3. Statistical significance was determined by Fisher Exact test.



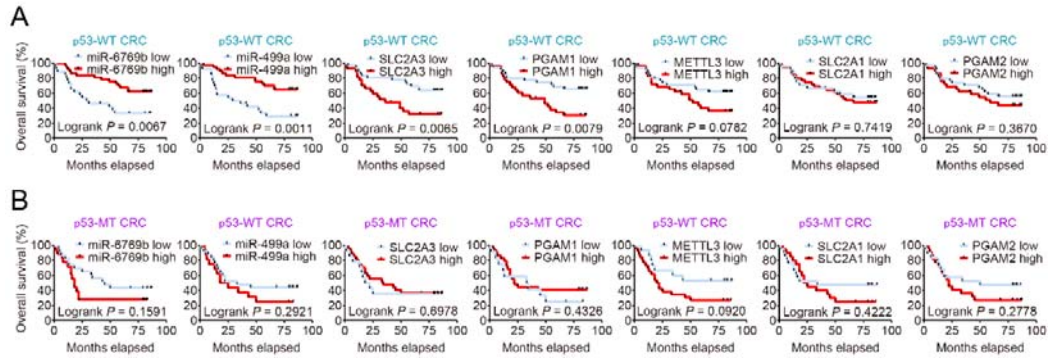

**Appendix Figure S8. Survival analysis of CRC patients based on expression levels of miR-6769b-3p, miR-499a-3p, SLC2A3, PGAM1, METTL3, SLC2A1 and PGAM2.**

A Kaplan-Meier survival curves of OS in CRC patients with wild type p53 (n = 63) from Cohort 3 database based on expression levels of miR-6769b-3p, miR-499a-3p, SLC2A3, PGAM1, METTL3, SLC2A1 and PGAM2. Statistical significance was performed by log-rank test.

B Kaplan-Meier survival curves of OS in CRC patients with mutant p53 (n = 41) from Cohort 3 database based on expression levels of miR-6769b-3p, miR-499a-3p, SLC2A3, PGAM1, METTL3, SLC2A1 and PGAM2. Statistical significance was performed by log-rank test.

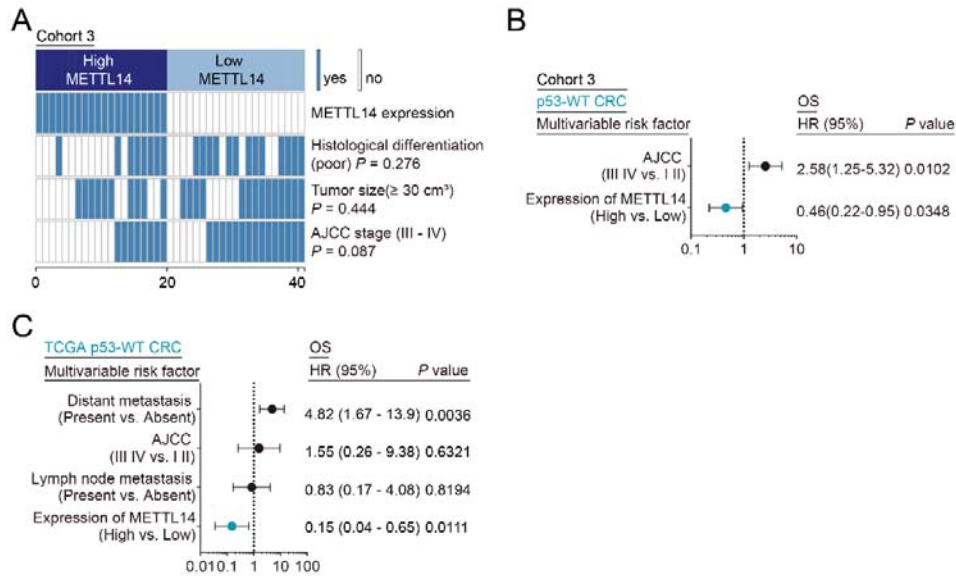

**Appendix Figure S9. Correlation analysis of METTL14 and clinicopathological characteristics or OS in p53-MT patients.**

A Comparison of clinicopathological characteristics between METTL14 high and low-expression tumors in p53-MT patients from Cohort 3 (n = 41). Statistical significance was performed by the Chi-square test.

B, C Multivariate Cox regression analysis of clinicopathologic factors for OS applied in p53-WT samples from Cohort 3 and TCGA CRC.

**Appendix Table S1. The sequences of siRNAs, microRNA mimics and inhibitors used this study.**

| Gene                       | Sense                       | Antisense                   |
|----------------------------|-----------------------------|-----------------------------|
| METTL14-1                  | GGAUGAAGGAGAGACAGAU         | AUCUGUCUCUCCUUAUCCTT        |
| METTL14-2                  | GCAGCACCUCGAUCAUUUATT       | UAAAUGAUCGAGGUGCUGCTT       |
| p53-1                      | GUAACUACUGGGACGGAATT        | UCCGUCCCAGUAGAUUACTT        |
| p53-2                      | GAAGAAACCACUGGAUGGATT       | UCCAUCCAGUGGUUUUCUUCTT      |
| ELK1-1                     | GCUGAGAGAGCAAGGCAAUTT       | AUUGCCUUGCUCUCUCAGCTT       |
| ELK1-2                     | CCCUUCAUCAGCGUGGAUTT        | AUCCACGCUGAUAGAAGGGTT       |
| HIF-1 $\alpha$             | GCUGAUUUUGUGAACCCAUUTT      | AAUGGGUUCACAAAUCAGCTT       |
| MYC                        | GAGGAUAUCUGGAAGAAUUTT       | AUUUCUCCAGAUUCCUUCTT        |
| SLC2A3-1                   | GUAGCUAAGUCGGUUGAAATT       | UUUCAACCGACUUAGCUACTT       |
| SLC2A3-2                   | CCUACAAAGUGCAGCCCUUTT       | AAGGGCUGCACUUUGUAGGTT       |
| PGAM1-1                    | GGCUAUGAGUUUGACAUCUTT       | AGAUGUCAAAACUCAUAGCCTT      |
| PGAM1-2                    | CCUCAUAGAGCGGCACUAUTT       | AUAGUGCCGCUCAUUGAGGTT       |
| YTHDF1                     | GGCGUGUGUUAUCAUCAATT        | UUGAUGAUGAACACACGCCTT       |
| YTHDF2                     | CCUACCAGAUGCAAUGUUUTT       | AAACAUUGCAUCUGGUAGGTT       |
| YTHDF3                     | AGCAGAGGAAACAGGCGAATT       | UUCGCCUGUUUCCUCUGCUTT       |
| YTHDC1                     | GGAGGAAGAAGAAGAAUUTT        | AUAUUCUUCUUCUCCUCCTT        |
| YTHDC2                     | GCGACUCAACAAUGGCAUUTT       | UAUGCCAUUGUUGAGUCGCTT       |
| IGF2BP1                    | CCGCUUGUAAGAUGAUCUUTT       | AAGAUCAUCUACAAGCGGTT        |
| IGF2BP2                    | GCGAAAGGAUGGUCAUCAUTT       | AUGAUGACCAUCCUUUCGCTT       |
| IGF2BP3                    | GCUGGAGCUUCAUUUAGATT        | UCUUAAUUGAAGCUCCAGCTT       |
| hsa-miR-6769b-3p mimics    | CCCUCUCUGUCCACCCAUAG        | AUGGGUGGGACAGAGAGGGUU       |
| hsa-miR-1321 mimics        | CAGGGAGGUGAAUGUGAU          | CACAUUCACCUCCUGUU           |
| hsa-miR-7160-5p mimics     | UGCUGAGGUCCGGCUGUGCC        | CACAGCCCGGACCUCAGCAUU       |
| hsa-miR-380-3p mimics      | UAUGUAAUAUGGUCCACAUCUU      | GAUGUGGACCAUAUACAUAUU       |
| hsa-miR-3149 mimics        | UUUGUAUGGAUAUGUGUGUGUA<br>U | ACACACACAUAUCCAUAACAAA<br>U |
| has-miR-499a-3p mimics     | AACAUCACAGCAAGUCUGUGCU      | CACAGACUUGCUGUGAUGUUUU      |
| hsa-miR-6769b-3p inhibitor | CUAUGGGUGGGACAGAGAGGG       |                             |
| hsa-miR-499a-3p inhibitor  | AGCACAGACUUGCUGUGAUGUU      |                             |
| hsa-mimics-NC              | UUCUCCGAACGUGUCACGUTT       | ACGUGACACGUUCGGAGAATT       |
| hsa-inhibitor-NC           | CAGUACUUUUGUGUAGUACAA       |                             |

**Appendix Table S2. Sequence of primers used for real-time PCR.**

| Gene           | Primer (Forward)        | Primer (Reverse )        |
|----------------|-------------------------|--------------------------|
| METTL14        | AGTGCCGACAGCATTGGTG     | GGAGCAGAGGTATCATAGGAAGC  |
| p53            | CAGCACATGACGGAGGTGT     | TCATCCAAATACTCCACACGC    |
| p21            | TGTCCGTCAGAACCCATGC     | AAAGTCGAAGTTCCATCGCTC    |
| ELK1           | TCCCTGCTTCTACGCATACA    | GCTGCCACTGGATGGAAACT     |
| ALDOA          | ATGCCCTACCAATATCCAGCA   | GCTCCCAGTGGACTCATCTG     |
| ALDOB          | GGCAGTTCGGAGAAATCCTCT   | CTCCTTGGTCTAACTTGATTCCC  |
| ALDOC          | ATGCCTCACTCGTACCCAG     | TTTCCACCCCAATTTGGCTCA    |
| ENO1           | TGGTGTCTATCGAAGATCCCTT  | CCTGGCGATCCTCTTTGG       |
| ENO2           | AGCCTCTACGGGCATCTATGA   | TTCTCAGTCCCATCCAACCTCC   |
| ENO3           | GGCTGGTTACCCAGACAAGG    | TCGTACTIONCCATTGCGATAGAA |
| FBP1           | CGCGCACCTCTATGGCATT     | TTCTTCTGACACGAGAACACAC   |
| FBP2           | ACCCGCTACGTTATGGAAAAG   | GCCGTCAGCATTGAGTTCAG     |
| G6PC           | ACTGGCTCAACCTCGTCTTTA   | CGGAAGTGTGCTGTAGTAGTCA   |
| GAPDH          | GGAGCGAGATCCCTCCAAAAT   | GGCTGTTGTCATACTTCTCATGG  |
| GAPDHS         | TGTGGGCATCAATGGATTTGG   | ACACCATGTATTCCGGGTCAAT   |
| GCK            | CCTGGGTGGCACTAACTTCAG   | TAGTCGAAGAGCATCTCAGCA    |
| GPI            | CAAGGACCGCTTCAACCACTT   | CCAGGATGGGTGTGTTTGACC    |
| HIF-1 $\alpha$ | GAACGTCGAAAAGAAAAGTCTCG | CCTTATCAAGATGCGAACTCACA  |
| HK1            | GCTCTCCGATGAAACTCTCATAG | GGACCTTACGAATGTTGGCAA    |
| HK2            | TGCCACCAGACTAACTAGACG   | CCCGTGCCACAATGAGAC       |
| HK3            | GGACAGGAGCACCTCATTTT    | CCTCCGAATGGCATCTCTCAG    |
| IGF1           | GCTCTTCAGTTCGTGTGTGGA   | GCCTCCTTAGATCACAGCTCC    |
| LDHA           | TTGACCTACGTGGCTTGGAAG   | GGTAACGGAATCGGGCTGAAT    |
| LDHAL6B        | GGTGGGAGCGAATTTCTATG    | GCTTCTCGGAAGTGAAACGC     |
| LDHB           | TGGTATGGCGTGTGCTATCAG   | TTGGCGGTCACAGAATAATCTTT  |
| LDHC           | AGAACATGGTGATTCTAGTGTGC | ACAGTCCAATAGCCCAAGAGG    |
| MPC1           | ACTATGTCCGAAGCAAGGATTTT | CGCCCACTGATAATCTCTGGAG   |
| MPC2           | TACCACCGGCTCCTCGATAAA   | TATCAGCCAATCCAGCACACA    |
| MYC            | TCCCTCCACTCGGAAGGAC     | CTGGTGCATTTTCGGTTGTTG    |
| PFKL           | GTACCTGGCGCTGGTATCTG    | CCTCTCACACATGAAGTTCTCC   |
| PFKM           | GGTGCCCGTGTCTTCTTTGT    | AAGCATCATCGAAACGCTCTC    |
| PFKP           | CGCCTACCTCAACGTGGTG     | ACCTCCAGAACGAAGGTCTCTC   |
| PGAM1          | TCTGGAGGCGTCCTATGAT     | TCTGTGAGGTCTGCATACCTG    |
| PGAM2          | AGAAGCACCCCTACTACAACTC  | TCTGGGGAACAATCTCTCTCGT   |
| PGK1           | TGGACGTAAAGGGAAGCGG     | GCTCATAAGGACTACCGACTTGG  |
| PGK2           | AAACTGGATGTTAGAGGGAAGCG | GGCCGACCTAGATGACTCATAAG  |
| PKLR           | TCAAGGCCGGATGAACATTG    | CTGAGTGGGGAACCTGCAAAG    |
| PKM            | ATGTCGAAGCCCCATAGTGAA   | TGGGTGGTGAATCAATGTCCA    |
| SLC2A1         | GGCCAAGAGTGTGCTAAAGAA   | ACAGCGTTGATGCCAGACAG     |

|               |                           |                         |
|---------------|---------------------------|-------------------------|
| SLC2A3        | GCTGGGCATCGTTGTTGGA       | GCACTTTGTAGGATAGCAGGAAG |
| SLC2A5        | GAGGCTGACGCTTGTGCTT       | CCACGTTGTACCCATACTGGA   |
| YTHDF1        | ATGACAATGACTTTGAGCCCTA    | AGGGAGTAAGGAAATCCAATGG  |
| YTHDF2        | ACTTCTCAGCATGGGGAAATAA    | TATTCATGCCAGGAGCCTTATT  |
| YTHDF3        | GCTCCACCAACCCAACCAGTTC    | CTGAGGTCCTTGTGCTGCTGTG  |
| YTHDC1        | AGTGACTIONCTGGTTCTGAATCTG | CTGGTTTGATCTTTTCGGACAG  |
| YTHDC2        | GAGAATTGGGCTGTCGTTAAAG    | TGAAGCAGGATGAAATCGTACT  |
| IGF2BP1       | GATGAAGGCCATCGAAACTTTC    | GGGGTGGAATATTTTCGGATTG  |
| IGF2BP2       | GATGAACAAGCTTACATCGGG     | GATTTTCCCATGCAATCCACT   |
| IGF2BP3       | GAGGCGCTTTCAGGTAAAAATAG   | AATGAGGCGGGATATTTTCGTAT |
| ACTB          | AGAGCCTCGCCTTTGCCGATCC    | CTGGGCCTCGTCGCCACATA    |
| pre-SLC2A3    | CAAGGTCACCTTCTCTGCTGA     | GCCAACTTCTACGCCATCC     |
| pre-PGAM1     | CACAACCAGGCACAACCTTACA    | GACCACCAACAAACTACAGCAA  |
| pre-miR-6769b | CTCCTGGTGGGTGGGGA         | CTATGGGTGGGACAGAGAGGG   |
| pre-miR-499a  | GCGGCTGTTAAGACTTGCA       | GCACAGACTTGCTGTGATGTTC  |
| pri-miR-6769b | GCTCCAGGCTGAGCCACTT       | TCCATCACCAGTACCTTCTGCC  |
| pri-miR-499a  | ACAAGGTAAGGCCCCATCTG      | AGCGTAGGGACGGGAAGC      |

**Appendix Table S3. Sequence of primers used for Chip-PCR.**

| Gene                              | Primer (Forward)                    | Primer (Reverse )                     |
|-----------------------------------|-------------------------------------|---------------------------------------|
| METTL14 Promoter #1 (-3000~-2701) | TTAGGTATTTATACTCTCGA<br>ACCTAGACA   | CCAGCTACTTGGGAGGCT                    |
| METTL14 Promoter #2 (-2700~-2401) | GATTACAGGCGCCCAACAC                 | CACATTATAACTTATGCATC<br>TCTCCCA       |
| METTL14 Promoter #3 (-2400~-2101) | GATCTCTCTTACTTCCTTA<br>AATTAAGTGC   | TTTACAAAAGTGTGGAGTT<br>GGGC           |
| METTL14 Promoter #4 (-2100~-1801) | TATTACATGGAAGTACATA<br>TCTGCATCAGT  | CCAGTTGGAGCAGCCCC                     |
| METTL14 Promoter #5 (-1800~-1501) | CTCTAGACTTTGTAAGGGA<br>CATAGTCA     | ATGAGTTTACTGTCTAATGG<br>AGGATTTTTTC   |
| METTL14 Promoter #6 (-1500~-1201) | AAAGAAAACCGACTTTAG<br>TTTTTAATCTTTG | TGAAAGACAATTTTGAACA<br>AGTAGTCCT      |
| METTL14 Promoter #7 (-1200~-901)  | GACCTAGTTCTTCGAAAT<br>ACATTATAATTA  | TATTTGAGTTATTACCATTA<br>TTATTCACCACAC |
| METTL14 Promoter #8 (-900~-601)   | AGACTTTGGCCTTTGCTGC                 | CCACTCTCCCCACACCTTA<br>C              |
| METTL14 Promoter #9 (-600~-301)   | GCAGATGTTGTGGCTGTTAC<br>C           | CCACTCTCCCCACACCTTA<br>C              |
| METTL14 Promoter #10 (-300~-50)   | CTGTCATCTGTGGAATCAAT<br>TGAAAAG     | GAGTCATAGCCACAAAATT<br>GAGATTATG      |
