# Supplementary material for: METTL14 modulates glycolysis to inhibit colorectal tumorigenesis in p53‐wild‐type cells
Source: PubMed Central journal article supplement (PMC10074077; doi:10.15252/embr.202256325), 2023-02-16

# Source data for Fig 5

Fig 5E

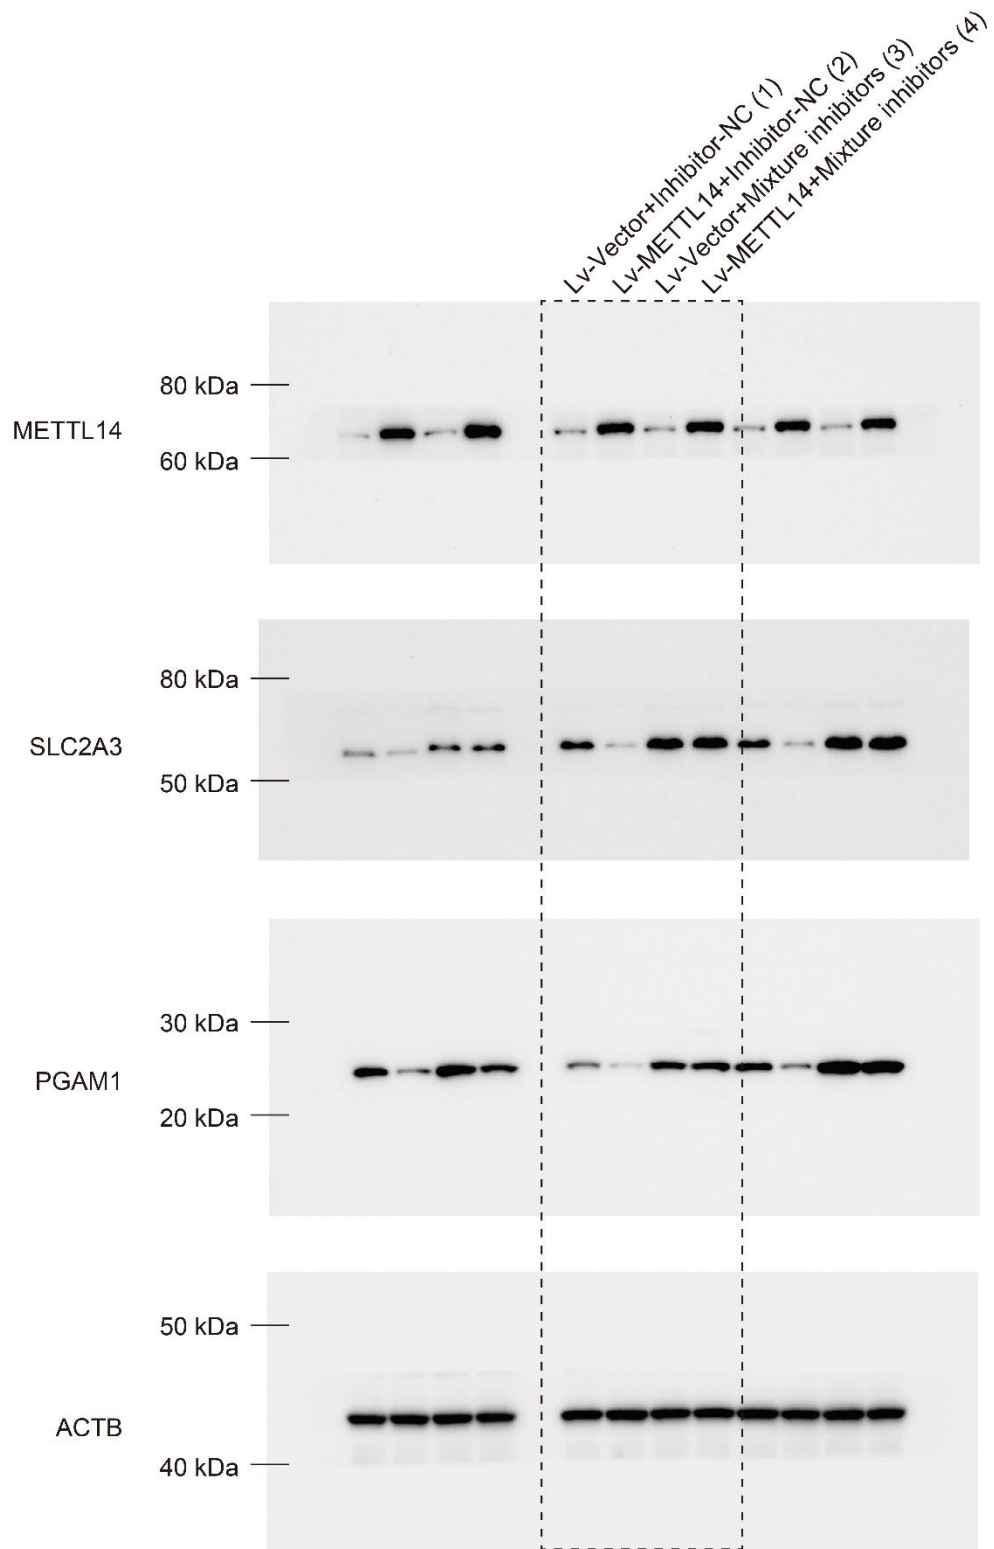

Fig 5F

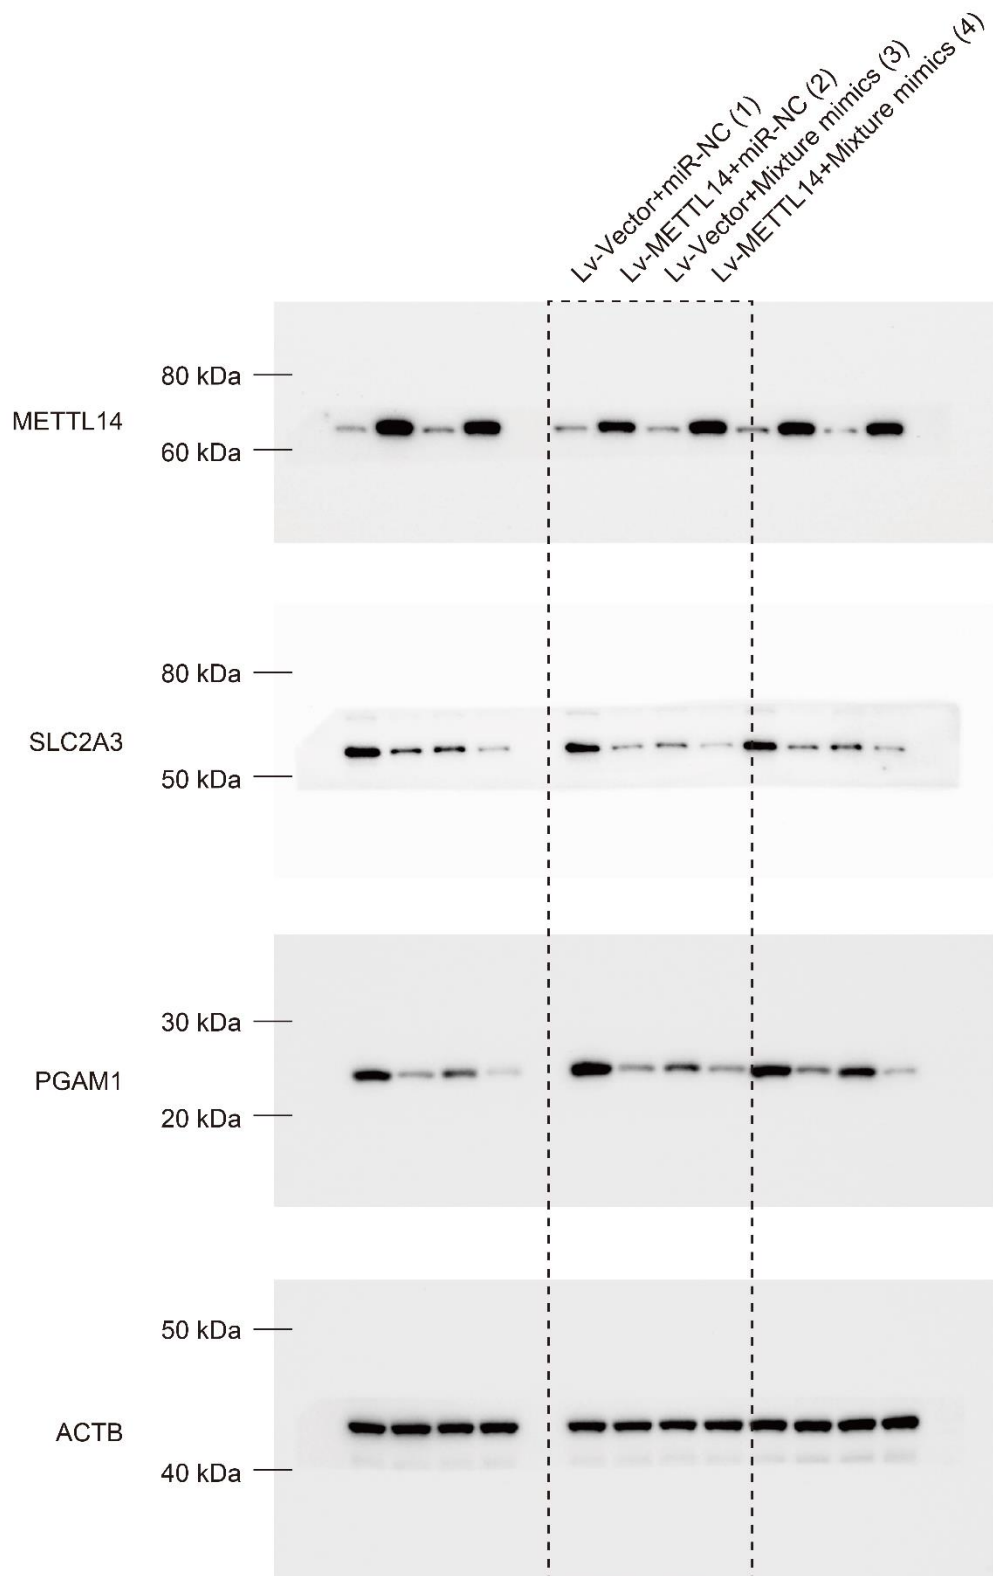

Fig 5K

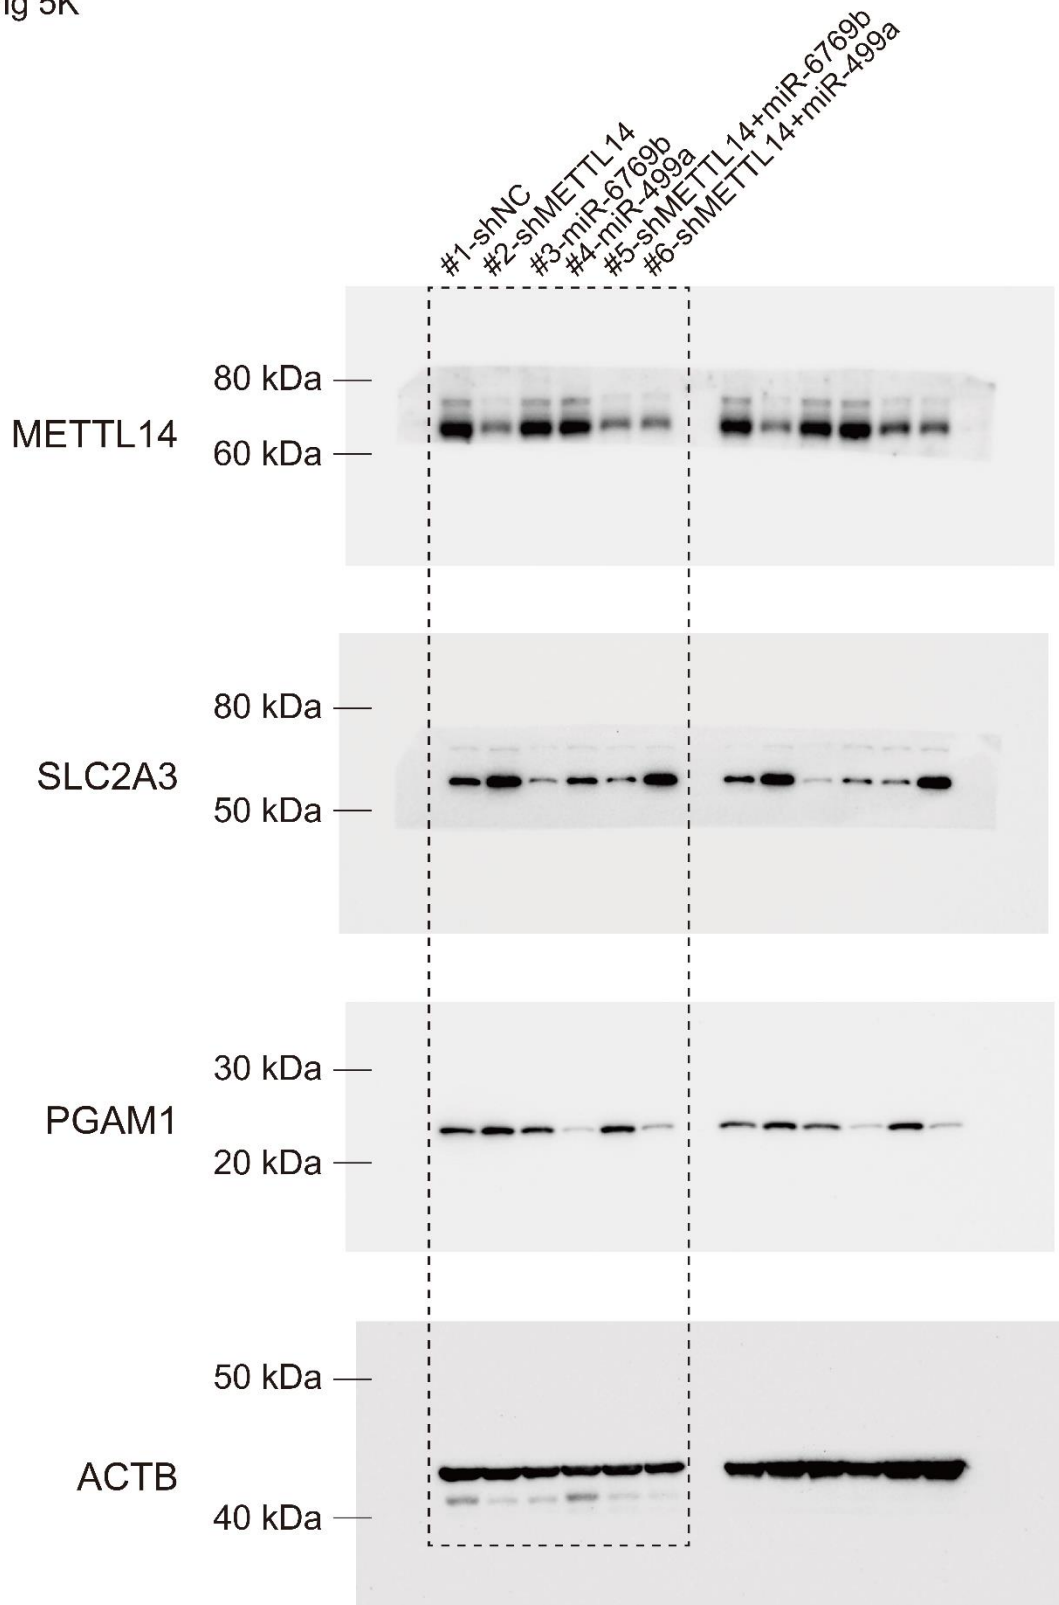

Supplement: EMBR-24-e56325-s012.pdf [file EMBR-24-e56325-s012.pdf]
